# Supplementary material for: Electrochemical sensor for endocrine disruptor bisphenol A based on a glassy carbon electrode modified with silica and nanocomposite prepared from reduced graphene oxide and gold nanoparticles
Source: Royal Society of Chemistry journal article supplement (doi:10.1039/c4ay01714e), 2014-09-02
Supplement: c4ay01714e1.pdf [file c4ay01714e1.pdf]

## **Supplementary Information**

**Electrochemical sensor for endocrine disruptorbisphenol A based on a glassy carbon electrode modified with silica and nanocomposite prepared from reduced graphene oxide and gold nanoparticle**

EnliLiu <sup>a</sup>,Xiaoli zhang<sup>a\*</sup>

<sup>a</sup>School of Chemistry and Chemical Engineering, Shandong University,Jinan 250100, China

\*Tel: +8653188361318. Fax: +8653188564464

\* Email: zhangxl@sdu.edu.cn

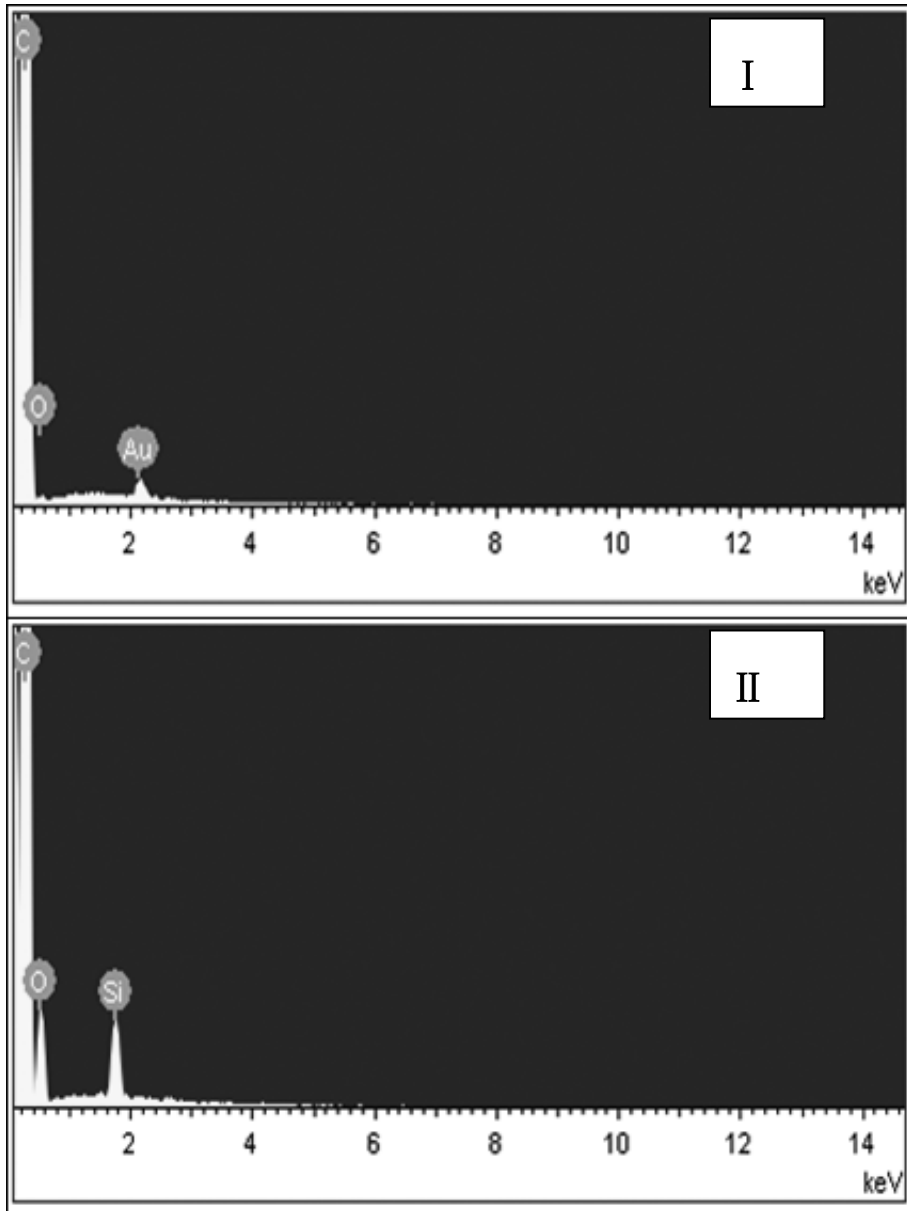

**Fig. S1.** EDS spectra of district I and II

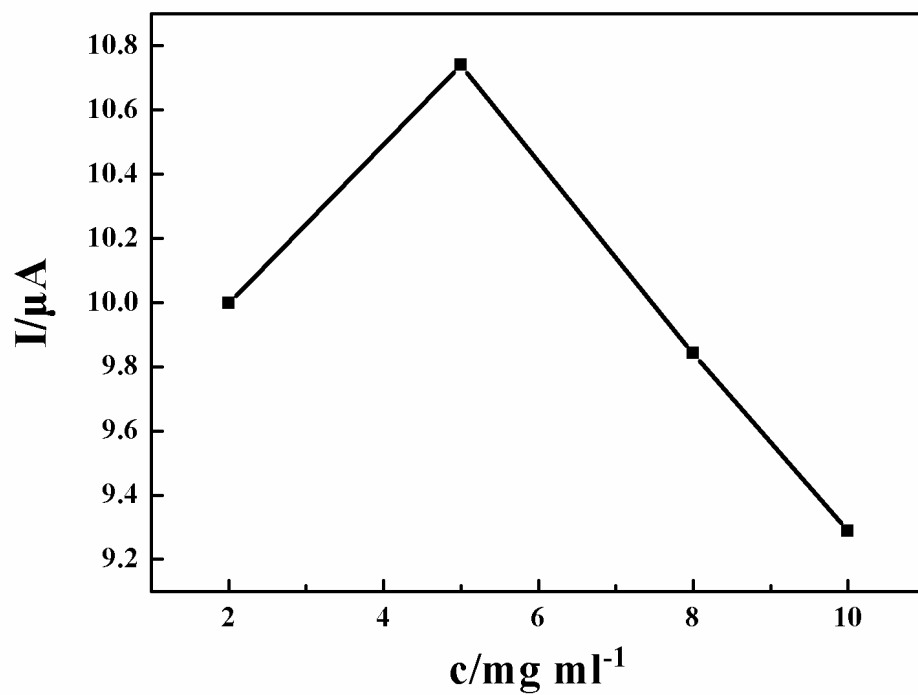

Fig. S2 Effect of content of SiO<sub>2</sub> nanoparticles on the peak current of 100 μM BPA

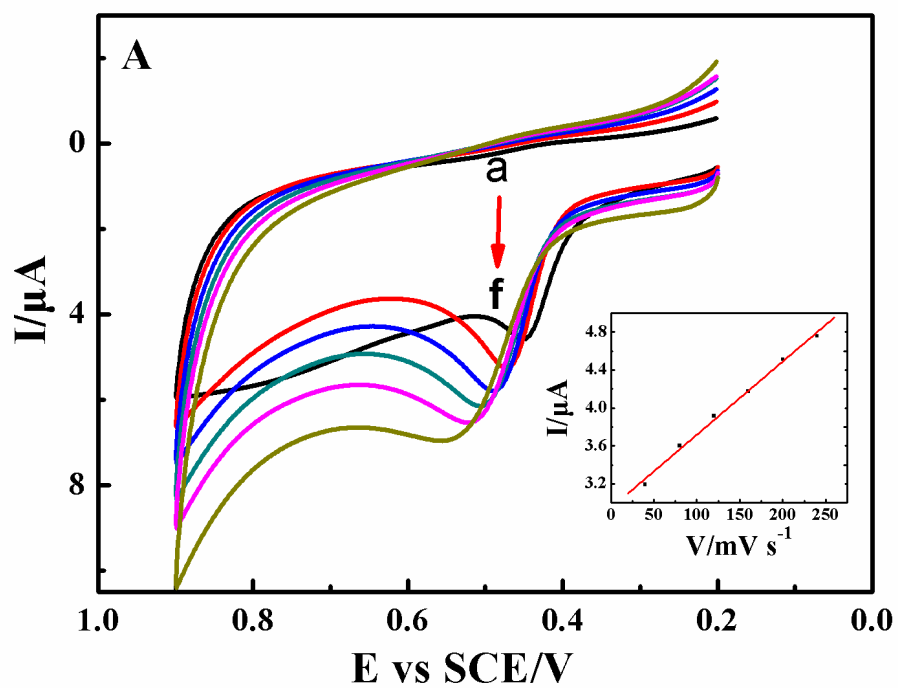

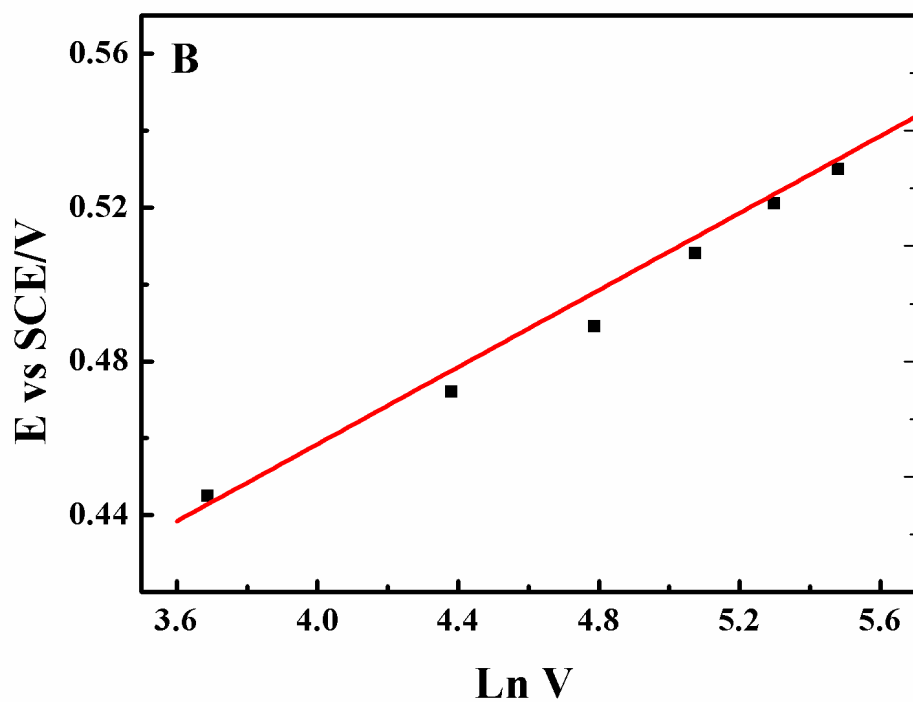

**Fig. S3** (A) Cyclic voltammograms of  $1.0 \times 10^{-5}$  mol·L<sup>-1</sup> BPA at SiO<sub>2</sub>/rGO-AuNPs/GCE at different scan rate (from a to f: 40, 80, 120, 160, 200 and 240 mV·s<sup>-1</sup>); Insets were the plots of peak currents vs. the scan rates. (B) The plots of peak potentials vs. the natural logarithm of scan rates.
